# Supplementary material for: Immunosuppressive Activities of Novel PLA2 Inhibitors from Xenorhabdus hominickii, an Entomopathogenic Bacterium
Source: PubMed Central journal article supplement (PMC7469199; doi:10.3390/insects11080505), 2020-08-04
Supplement: insects-11-00505-s001.pdf [file insects-11-00505-s001.pdf]

## Supplementary data

**Table S1.** Statistical parameters to estimate median toxicities presented in Table 1

**Table S2.** Statistical parameters to estimate median toxicities presented in Table 2

**Table S3.** Statistical parameters to estimate median toxicities presented in Table 3

**Figure S1.** HPLC chromatograms of four different organic extracts of *X. hominickii* ('Xh') culture broth. Hexane ('HEX'), ethyl acetate ('EAX'), chloroform ('CX'), and butanol ('BX') organic solvents were used to extract metabolites.

**Figure S2.** Screening 15 subfractions ('F1-F15') of butanol extract against PLA<sub>2</sub> hemocyte PLA<sub>2</sub> activity of *S. exigua*. Each measurement was replicated three times. Different letters above standard deviation bars indicate significant differences among means at Type I error = 0.05 (LSD test).

**Figure S3.** Subfractions of two potent fractions ('F2 and F6'). (A) HPLC analysis of F2 and F6. (B) Preparatory TLC to isolate compounds in each subfraction. Eluent composed of chloroform, methanol, and acetic acid (7.5:2:0.5, v/v) in the silica plates.

**Figure S4.** HPLC analysis of eight active subfractions ('F2-1, F2-2, F2-6, F2-8, F6-3, F6-4, F6-8, and F6-9') from butanol extracts of *X. hominickii* culture broth.

**Figure S5.** GC-MS analysis of eight active subfractions ('F2-1, F2-2, F2-6, F2-8, F6-3, F6-4, F6-8, and F6-9') from *X. hominickii* culture broth. Predicted compounds are indicated by

arrows among GC peaks. These include dioctyl terephthalate (DOTP) from F2-1, 3-ethoxy-4-methoxyphenol (EMP) from F2-2, bis(2-ethylhexyl) phthalate (BEP) from F2-6, 2-ethyl-1-hexanol (EH) from F2-8, docosane (DS) from F6-3, phthalimide (PM) from F6-4, o-cyanobenzoic acid (CBA) from F6-8, dibutylamine (DBA) from F6-9.

**Figure S6.** Enhanced insecticidal activities of bacterial pathogens by eight PLA<sub>2</sub> inhibitors: dioctyl terephthalate (DOTP), 3-ethoxy-4-methoxyphenol (EMP), bis(2-ethylhexyl) phthalate (BEP), 2-ethyl-1-hexanol (EH), docosane (DS), phthalimide (PM), o-cyanobenzoic acid (CBA), and dibutylamine (DBA). (A) Enhanced effect of the inhibitors on *X. hominickii* ('Xh') pathogenicity. L5 larvae of *S. exigua* were hemocoelically injected with low dose ( $10^2$  cfu/larva) of Xh or along with the PLA<sub>2</sub> inhibitors (2 µg/larva). (B) Enhanced effect of the inhibitors on *Bacillus thuringiensis* ('Bt') pathogenicity. A small piece (2 cm<sup>2</sup>) of cabbage leaf was dipped in Bt (500 ppm) or a mixture with PLA<sub>2</sub> inhibitor (1,000 ppm). The treated leaves were provided to test *S. exigua* larvae. Each treatment was replicated three times with 10 insects per replication. Different letters above standard deviation bars represent significant differences among means at Type I error = 0.05 (LSD test). Insecticidal activity was assessed at 4 days after treatment (DAT).

**Table S1.** Statistical parameters to estimate median toxicities presented in Table 1

| Inhibitors | PLA <sub>2</sub>  | t      | IC <sub>50</sub> (95% CI) | Slope  | df | P      | SE     |
|------------|-------------------|--------|---------------------------|--------|----|--------|--------|
| BEP        | Total             | 0.8864 | 0.17 (0.09-0.32)          | 0.241  | 4  | 0.4255 | 0.014  |
|            | sPLA <sub>2</sub> | 1.1301 | 0.07 (0.04-0.13)          | 0.2352 | 4  | 0.3216 | 0.013  |
|            | cPLA <sub>2</sub> | 1.3396 | 0.09 (0.05-0.16)          | 0.2750 | 4  | 0.2514 | 0.11   |
| CBA        | Total             | 0.6183 | 0.86 (0.46-1.56)          | 0.244  | 4  | 0.5699 | 0.02   |
|            | sPLA <sub>2</sub> | 0.4186 | 1.11 (0.58-2.21)          | 0.197  | 4  | 0.7105 | 0.11   |
|            | cPLA <sub>2</sub> | 0.7448 | 0.38 (0.20-0.71)          | 0.2651 | 4  | 0.4978 | 0.034  |
| DBA        | Total             | 1.1182 | 0.18 (0.09-0.35)          | 0.249  | 4  | 0.3261 | 0.024  |
|            | sPLA <sub>2</sub> | 2.1514 | 0.11 (0.06-0.21)          | 0.2777 | 4  | 0.0978 | 00.024 |
|            | cPLA <sub>2</sub> | 1.586  | 0.19 (0.11-0.35)          | 0.2788 | 4  | 0.1878 | 00.022 |
| DOTP       | Total             | 2.0127 | 0.16 (0.09-0.29)          | 0.2765 | 4  | 0.1144 | 0.0064 |
|            | sPLA <sub>2</sub> | 0.3731 | 0.56 (0.30-1.1)           | 0.1878 | 4  | 0.728  | 0.054  |
|            | cPLA <sub>2</sub> | 1.1909 | 0.06 (0.04-0.11)          | 0.2584 | 4  | 0.2995 | 0.051  |
| DS         | Total             | 0.9750 | 0.81 (0.43-1.55)          | 0.2675 | 4  | 0.3848 | 0.044  |
|            | sPLA <sub>2</sub> | 0.1846 | 1.22 (0.62-2.21)          | 0.1722 | 4  | 0.8625 | 0.154  |
|            | cPLA <sub>2</sub> | 1.0165 | 0.32 (0.15-0.61)          | 0.2947 | 4  | 0.3669 | 0.024  |
| EH         | Total             | 0.6383 | 0.14 (0.08-0.29)          | 0.2441 | 4  | 0.5580 | 0.014  |
|            | sPLA <sub>2</sub> | 1.8931 | 0.05 (0.3-0.10)           | 0.238  | 4  | 0.1313 | 0.0044 |
|            | cPLA <sub>2</sub> | 3.0785 | 0.11 (0.06-0.20)          | 0.2742 | 4  | 0.0369 | 0.014  |
| EMP        | Total             | 1.4462 | 0.04 (0.02-0.07)          | 0.2684 | 4  | 0.2217 | 0.023  |
|            | sPLA <sub>2</sub> | 2.0511 | 0.03 (0.01-0.05)          | 0.2763 | 4  | 0.1096 | 0.0054 |
|            | cPLA <sub>2</sub> | 0.9557 | 0.05 (0.03-0.10)          | 0.2524 | 4  | 0.3934 | 0.0041 |
| PM         | Total             | 1.5955 | 0.05 (0.03-0.13)          | 0.2678 | 4  | 0.1858 | 0.0074 |
|            | sPLA <sub>2</sub> | 2.1430 | 0.17 (0.10-0.32)          | 0.2520 | 4  | 0.0988 | 0.014  |
|            | cPLA <sub>2</sub> | 1.052  | 0.04 (0.02-0.07)          | 0.2632 | 4  | 0.3520 | 0.0034 |

**Table S2.** Statistical parameters to estimate median toxicities presented in Table 2

| Inhibitors | Type         | t      | IC <sub>50</sub> (95% CI) | Slope  | df | P      | SE   |
|------------|--------------|--------|---------------------------|--------|----|--------|------|
| BEP        | Nodulation   | 2.517  | 1.0 (0.54-1.91)           | 0.3539 | 4  | 0.0656 | 0.11 |
|            | Phagocytosis | 5.980  | 1.50 (0.81-2.89)          | 0.3171 | 4  | 0.0039 | 0.22 |
| CBA        | Nodulation   | 5.025  | 2.50 (1.35-5.1)           | 0.4621 | 4  | 0.0074 | 0.22 |
|            | Phagocytosis | 2.4629 | 32.50 (17.10-63.0)        | 0.378  | 4  | 0.0695 | 2.35 |
| DBA        | Nodulation   | 2.681  | 0.71 (0.38-1.38)          | 0.4139 | 4  | 0.055  | 0.05 |
|            | Phagocytosis | 4.15   | 5.0 (2.8-9.4)             | 0.3112 | 4  | 0.0143 | 0.58 |
| DOTP       | Nodulation   | 1.5104 | 1.10 (0.61-2.12)          | 0.2812 | 4  | 0.205  | 0.07 |
|            | Phagocytosis | 1.5069 | 8.70 (4.6-16.4)           | 0.2613 | 4  | 0.2063 | 0.89 |
| DS         | Nodulation   | 2.0476 | 1.11 (0.54-2.21)          | 0.336  | 4  | 0.111  | 0.09 |
|            | Phagocytosis | 1.5485 | 8.40 (4.6-9.1)            | 0.3287 | 4  | 0.1964 | 0.68 |
| EH         | Nodulation   | 1.723  | 0.40 (0.24-0.76)          | 0.3537 | 4  | 0.160  | 0.03 |
|            | Phagocytosis | 2.480  | 0.50 (0.28-0.96)          | 0.3479 | 4  | 0.0678 | 0.03 |
| EMP        | Nodulation   | 3.188  | 0.20 (0.11-0.39)          | 0.3980 | 4  | 0.0332 | 0.02 |
|            | Phagocytosis | 4.190  | 0.20 (0.12-0.37)          | 0.3201 | 4  | 0.0138 | 0.03 |
| PM         | Nodulation   | 2.704  | 0.20 (0.11-0.39)          | 0.3734 | 4  | 0.054  | 0.02 |
|            | Phagocytosis | 2.571  | 0.40 (0.22-0.78)          | 0.3296 | 4  | 0.0619 | 0.05 |

**Table S3.** Statistical parameters to estimate median toxicities presented in Table 3

| Inhibitors | Type      | $\chi^2$ | IC <sub>50</sub> (95% CI) | Slope | df | SE    |
|------------|-----------|----------|---------------------------|-------|----|-------|
| BEP        | Injection | 0.870    | 34.88 (17.94-67.45)       | 0.310 | 4  | 0.603 |
|            | Feeding   | 0.955    | 2652.72 (1345.2-5268.9)   | 0.378 | 4  | 0.496 |
| CBA        | Injection | 0.985    | 54.96 (28.2-106.7)        | 0.321 | 4  | 0.599 |
|            | Feeding   | 0.984    | 2870.40 (1433.6-5679.2)   | 0.381 | 4  | 0.494 |
| DBA        | Injection | 0.856    | 38.77 (19.89-75.87)       | 0.316 | 4  | 0.597 |
|            | Feeding   | 0.988    | 3108.8 (1556.5-6210.9)    | 0.385 | 4  | 0.492 |
| DOTP       | Injection | 0.856    | 38.89 (20.4-76.3)         | 0.315 | 4  | 0.597 |
|            | Feeding   | 0.930    | 3232.9 (1621.5-6458.9)    | 0.356 | 4  | 0.522 |
| DS         | Injection | 0.836    | 49.54 (25.3-95.3)         | 0.298 | 4  | 0.629 |
|            | Feeding   | 0.971    | 3629.21 (1804.6-7243.8)   | 0.369 | 4  | 0.511 |
| EH         | Injection | 0.878    | 29.90 (15.8-55.2)         | 0.324 | 4  | 0.582 |
|            | Feeding   | 0.965    | 2451.52 (1236.9-4850.1)   | 0.374 | 4  | 0.498 |
| EMP        | Injection | 0.876    | 18.95 (10.5-33.7)         | 0.339 | 4  | 0.554 |
|            | Feeding   | 1.00     | 2160.10 (1091.5-4259.8)   | 0.335 | 4  | 0.541 |
| PM         | Injection | 0.906    | 22.11 (12.7-42.6)         | 0.336 | 4  | 0.560 |
|            | Feeding   | 0.995    | 2177.32 (1092.5-4320.4)   | 0.350 | 4  | 0.524 |

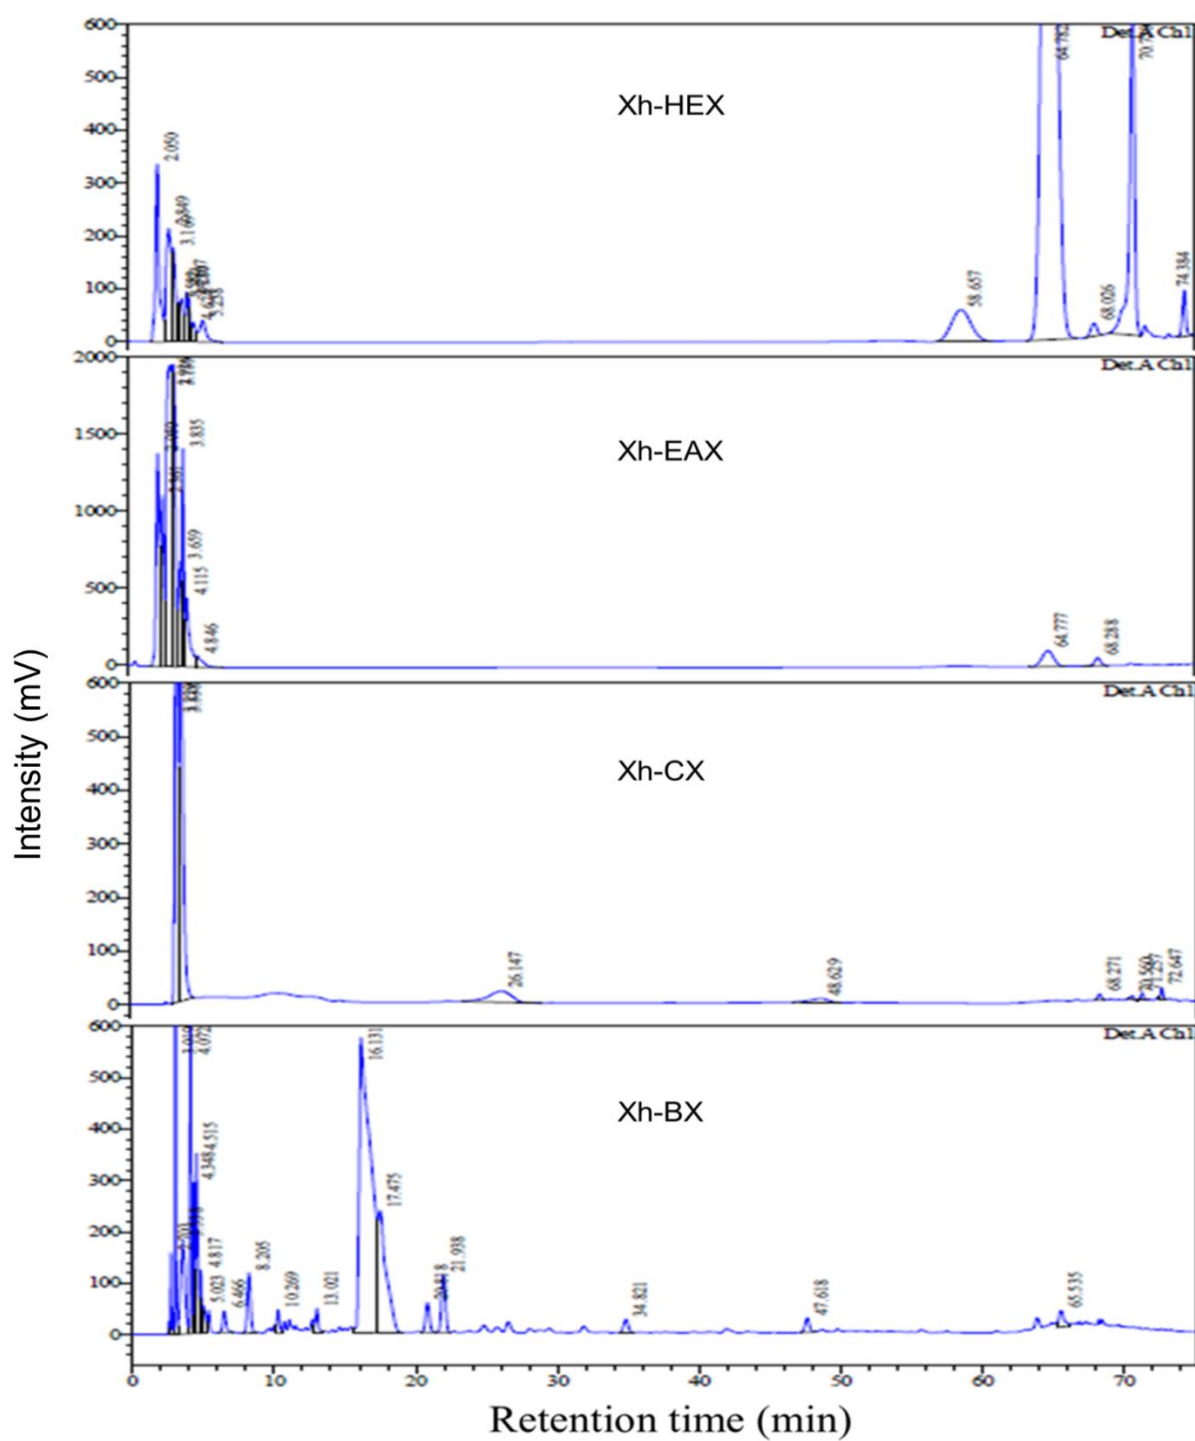

Fig. S1

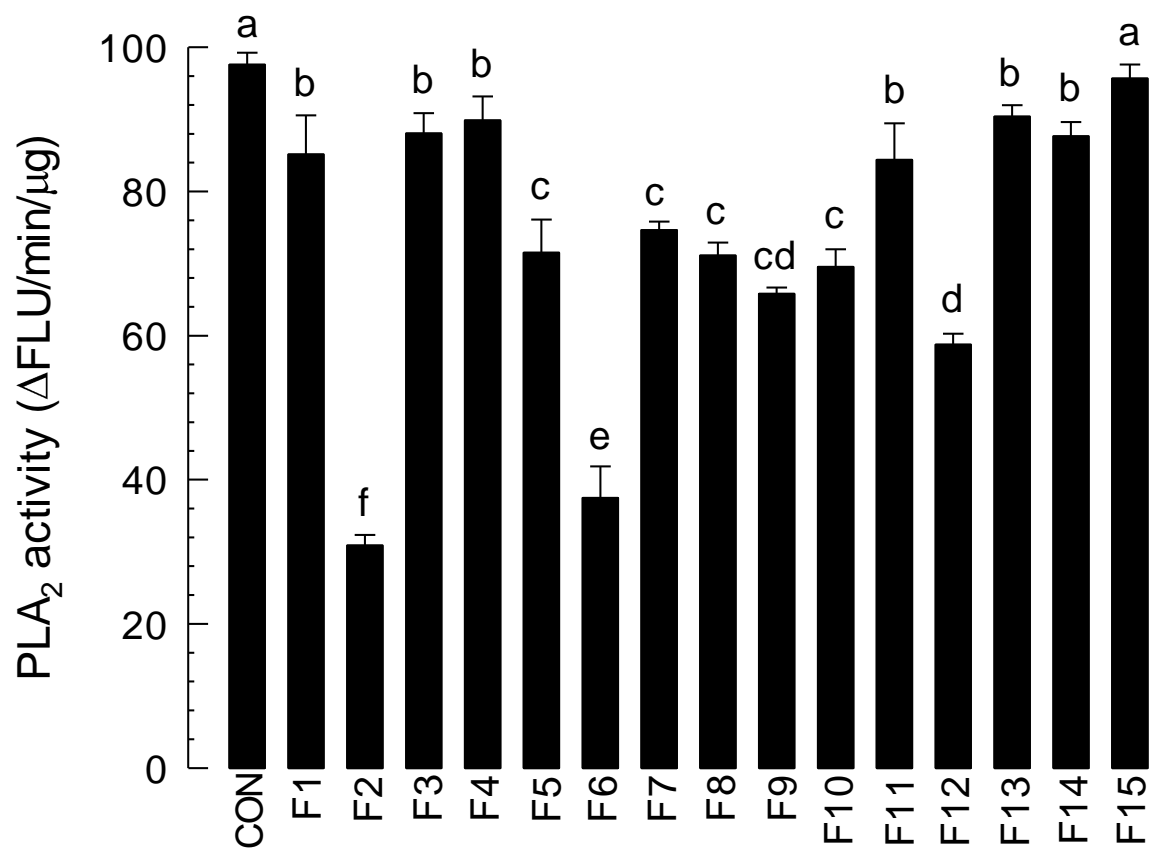

Fig. S2

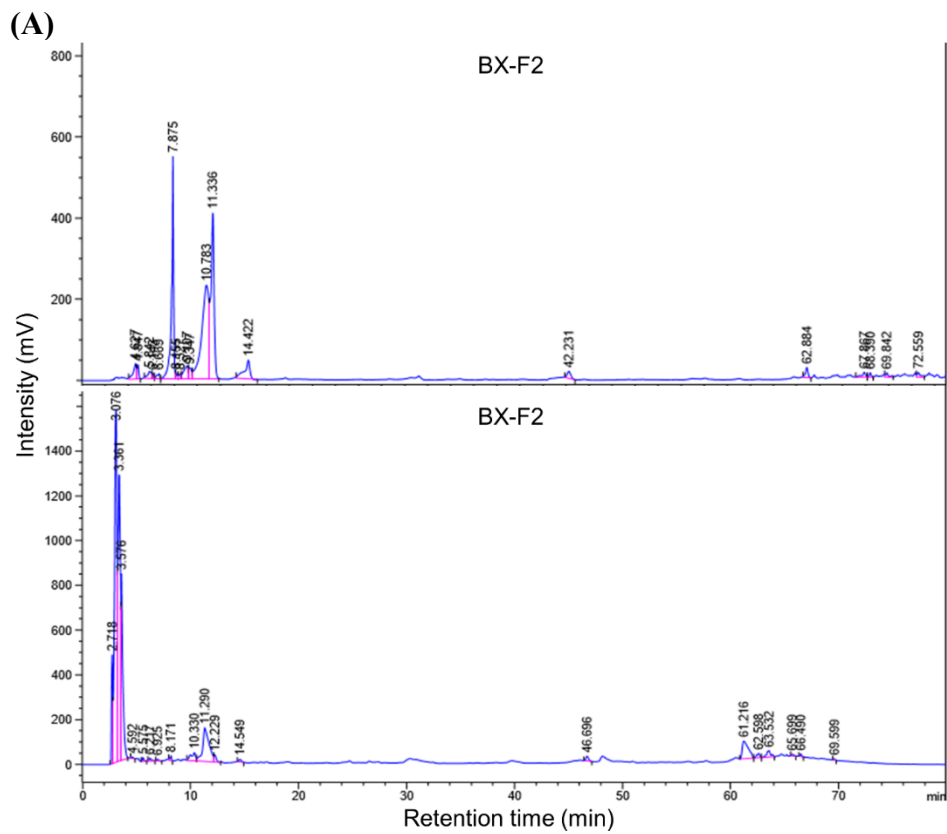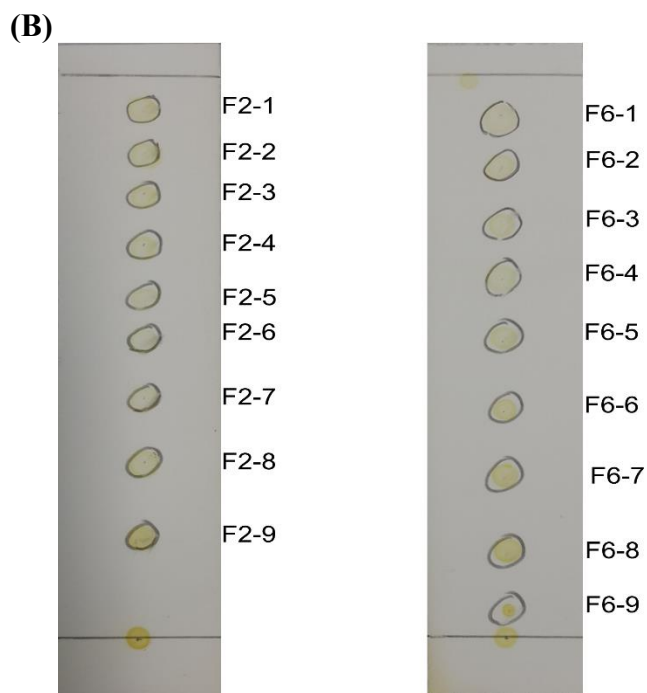

**Fig. S3**



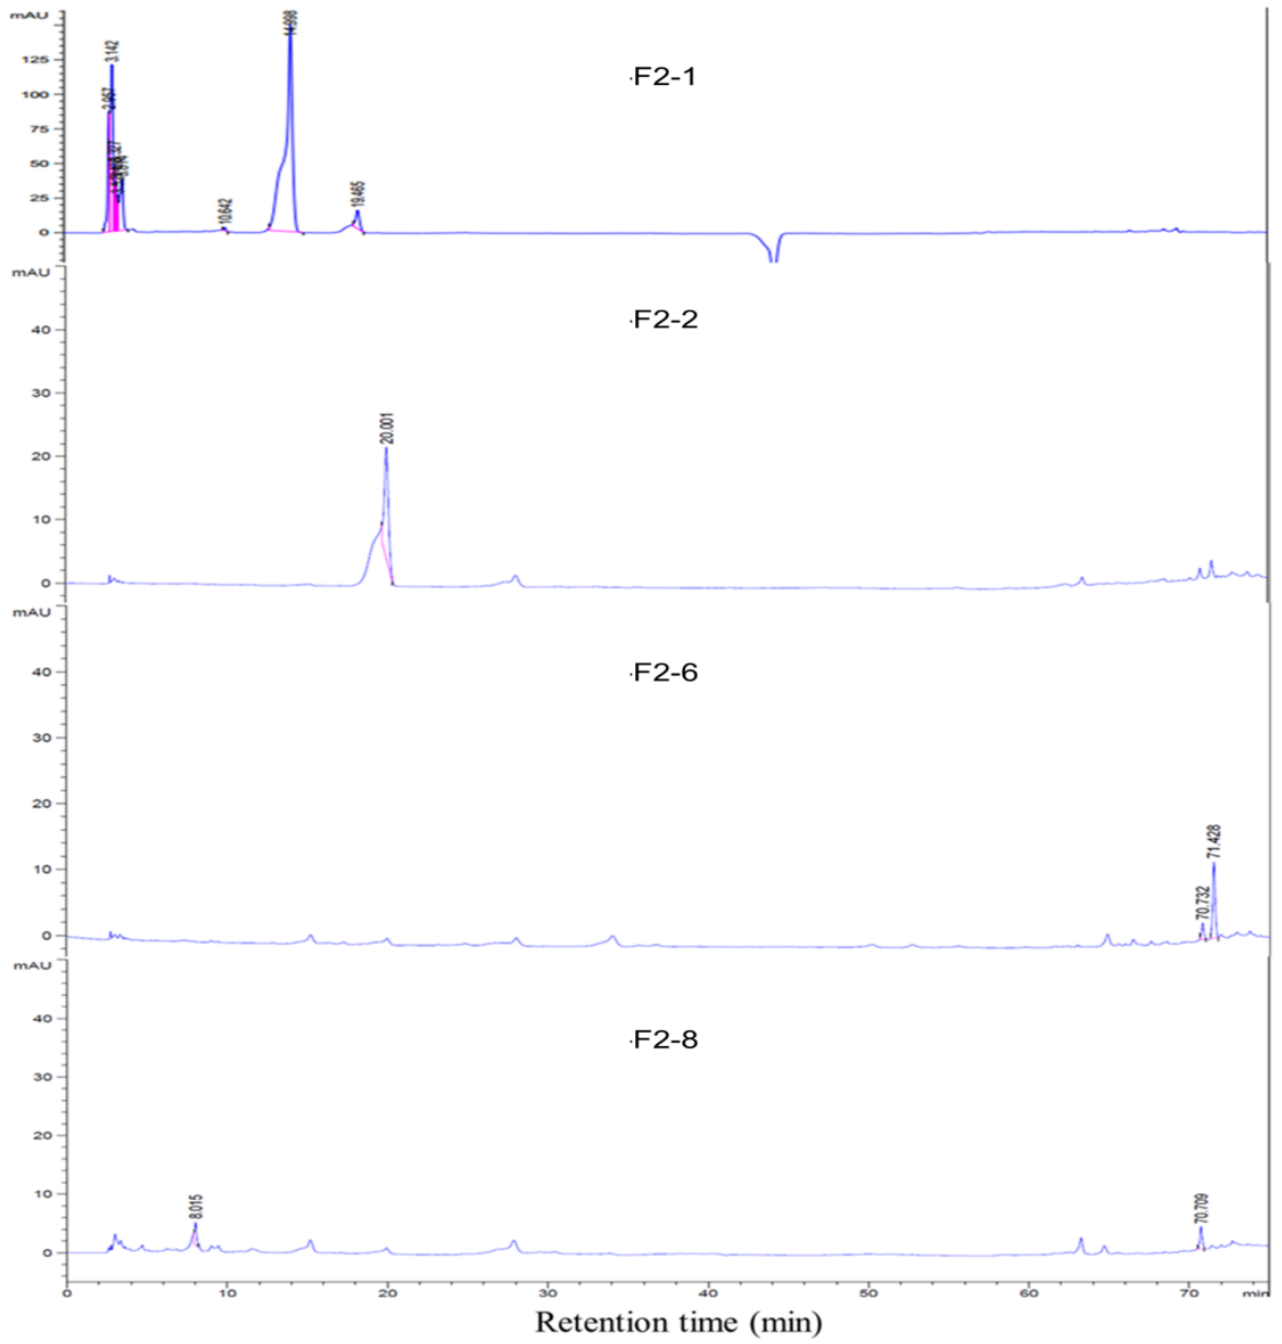

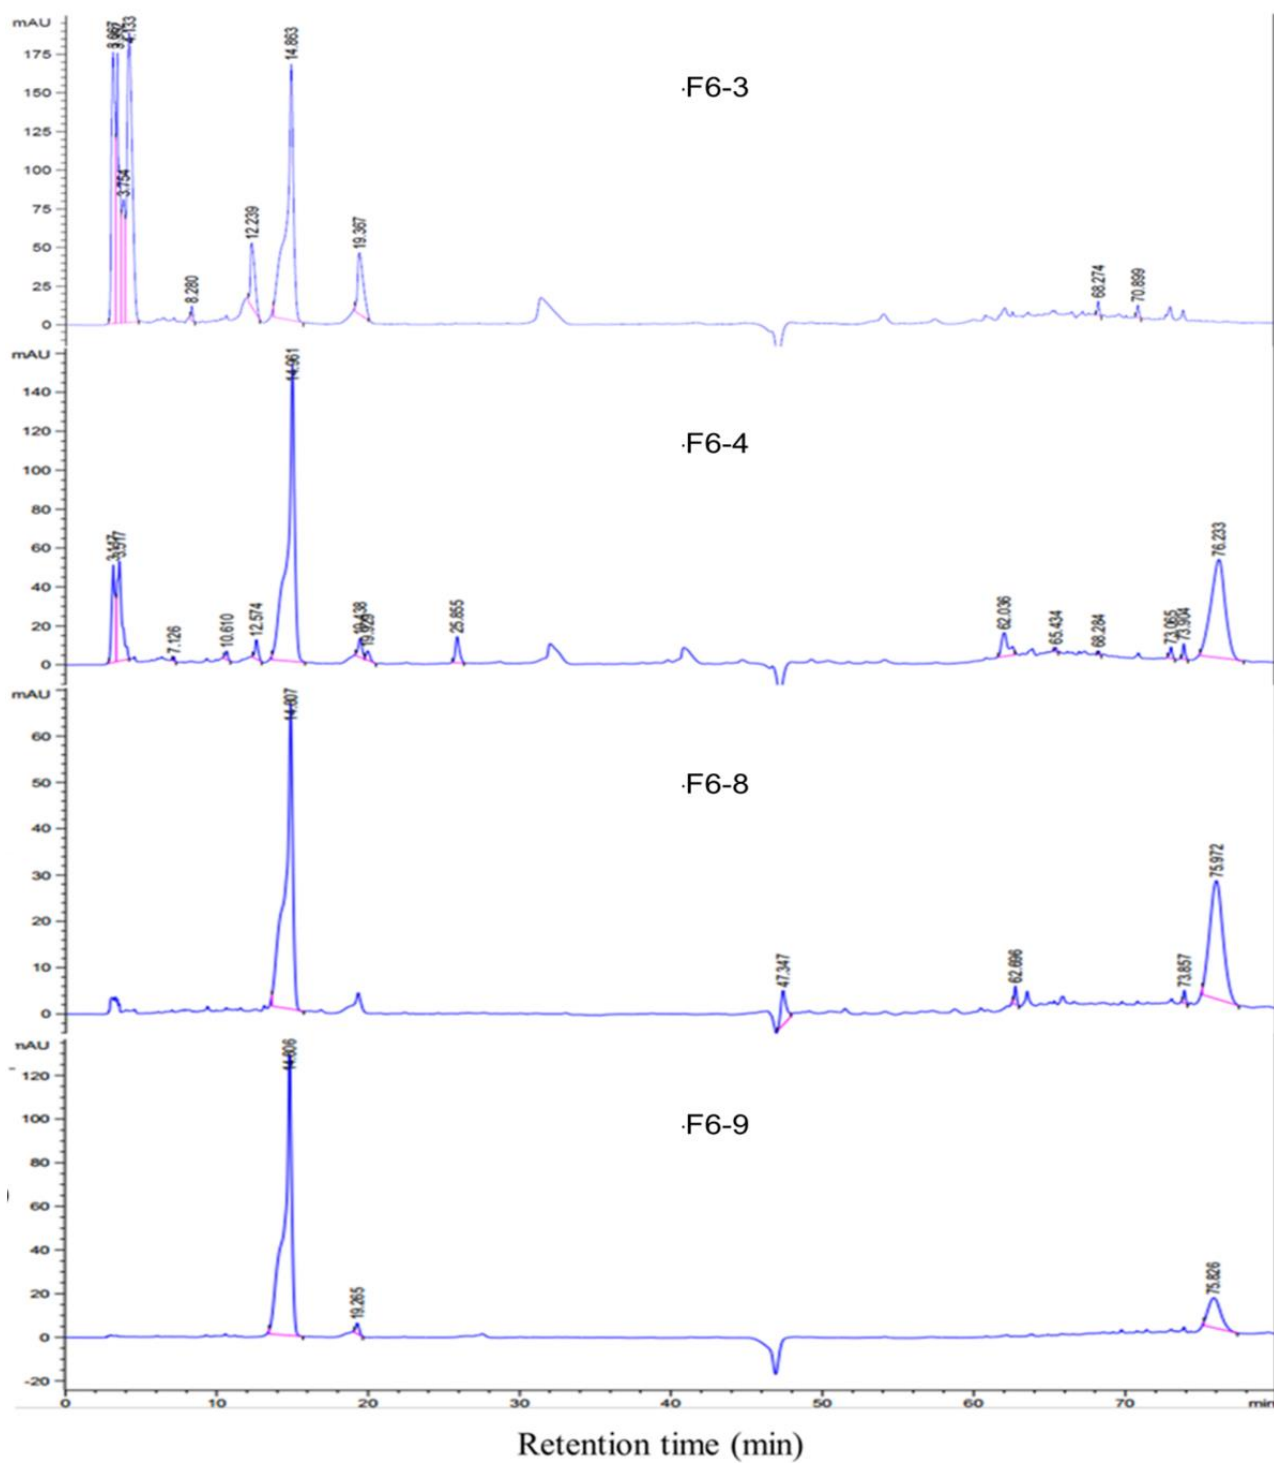

Fig. S4

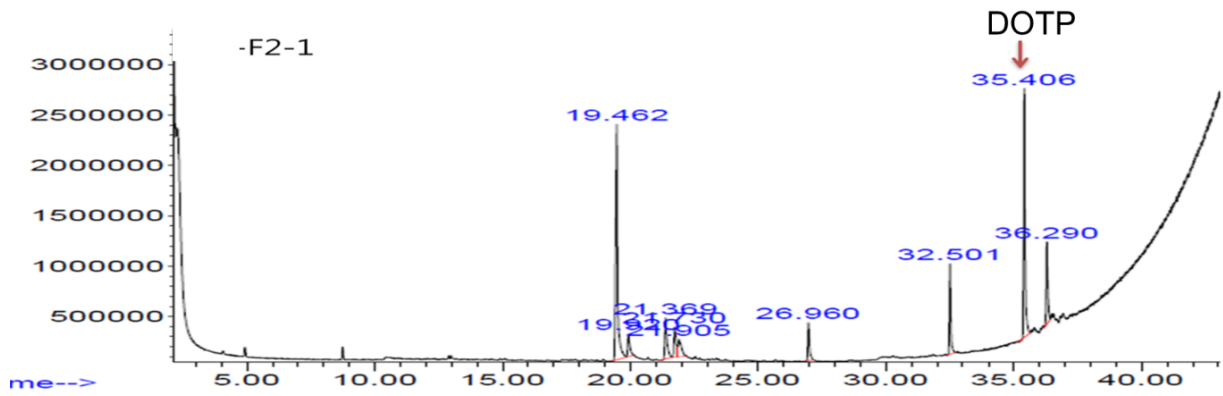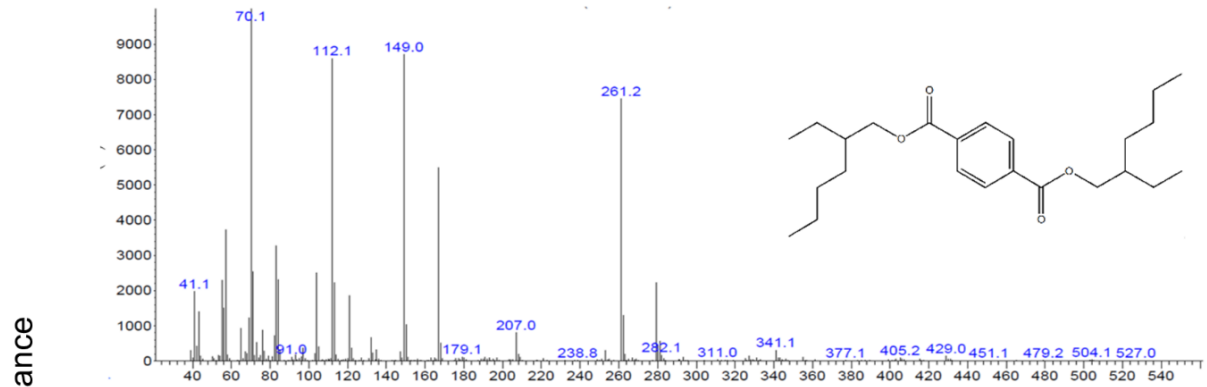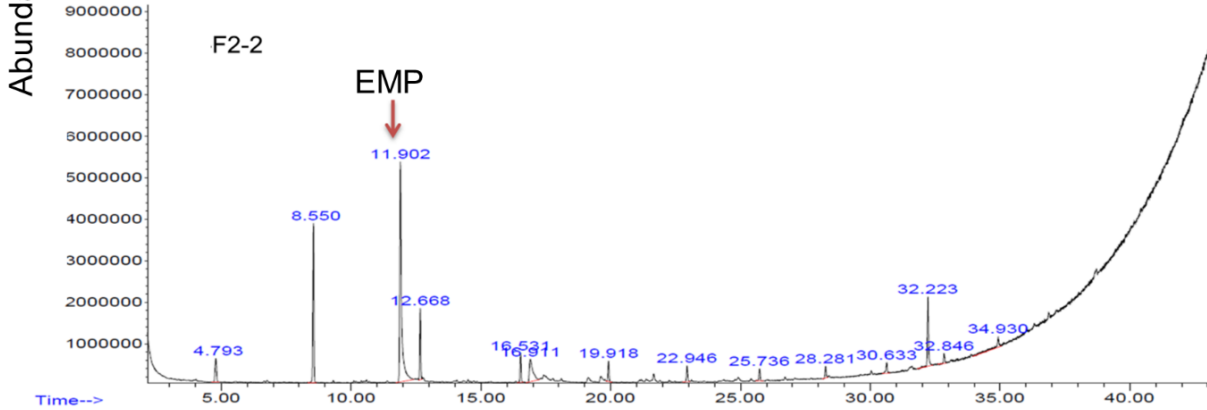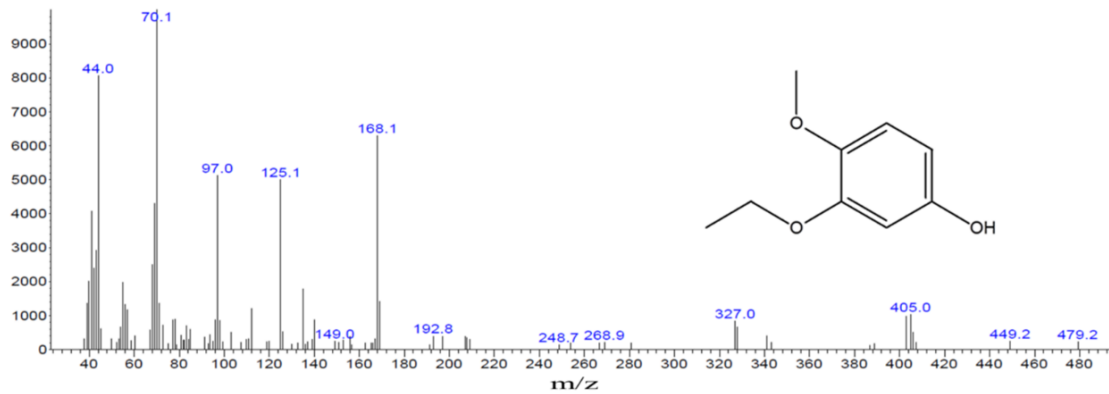

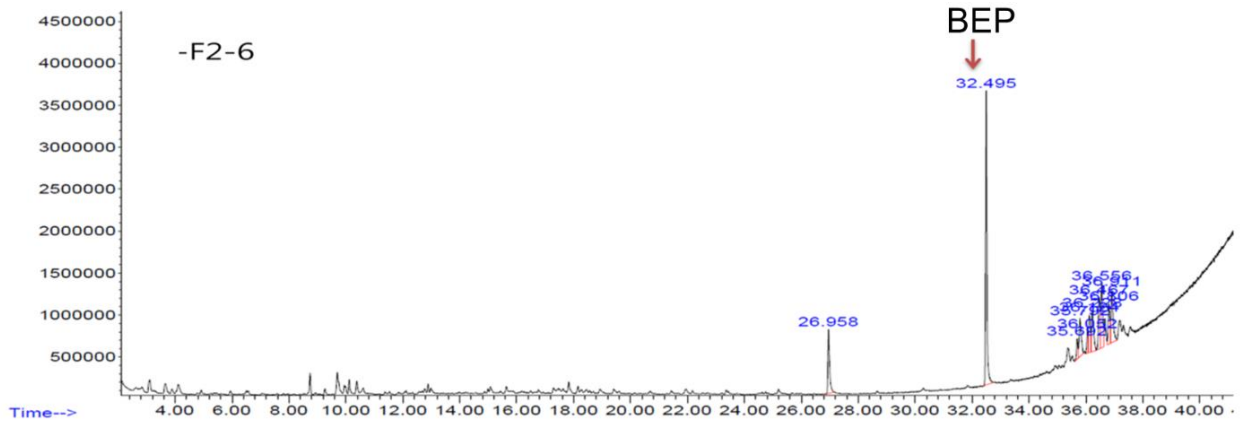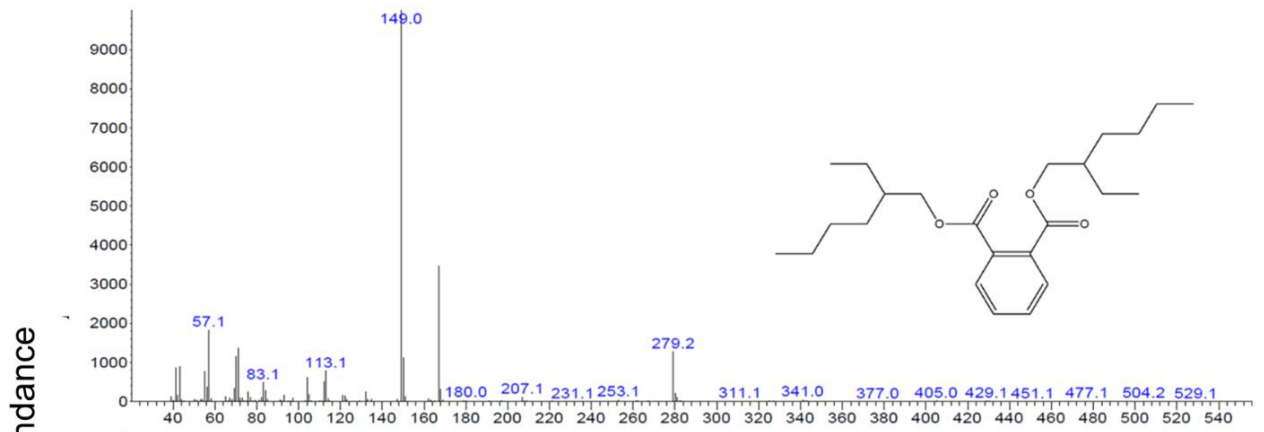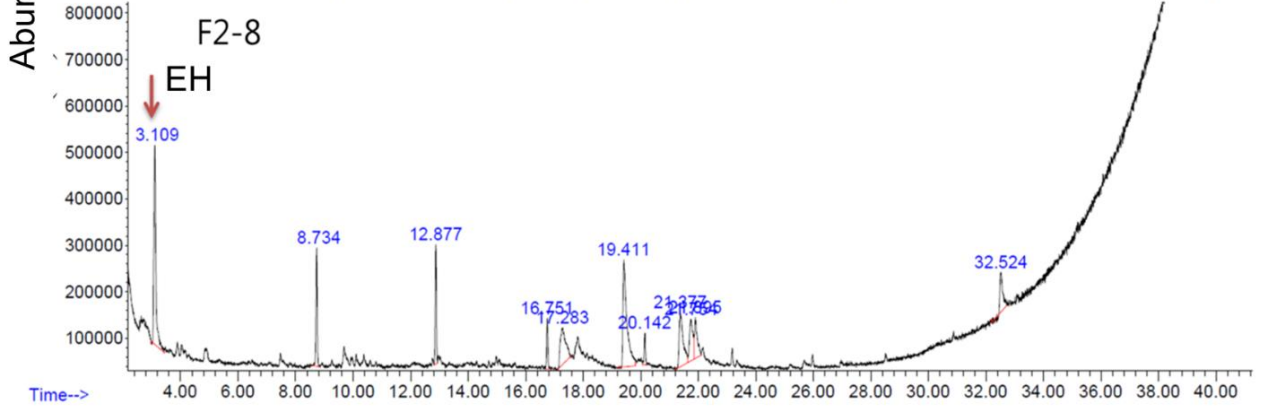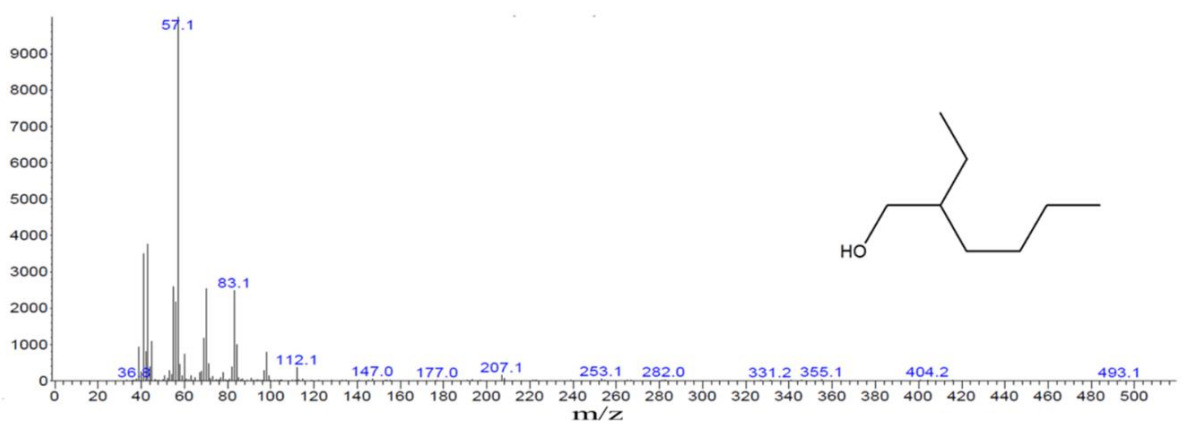

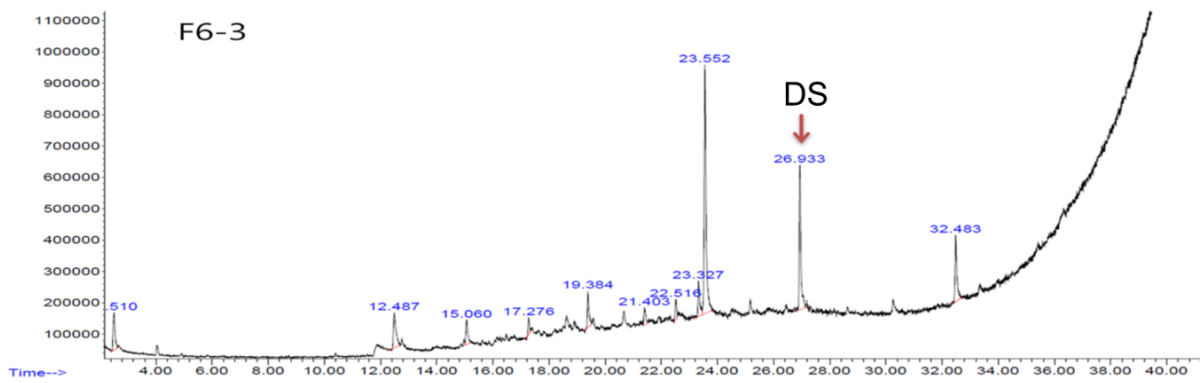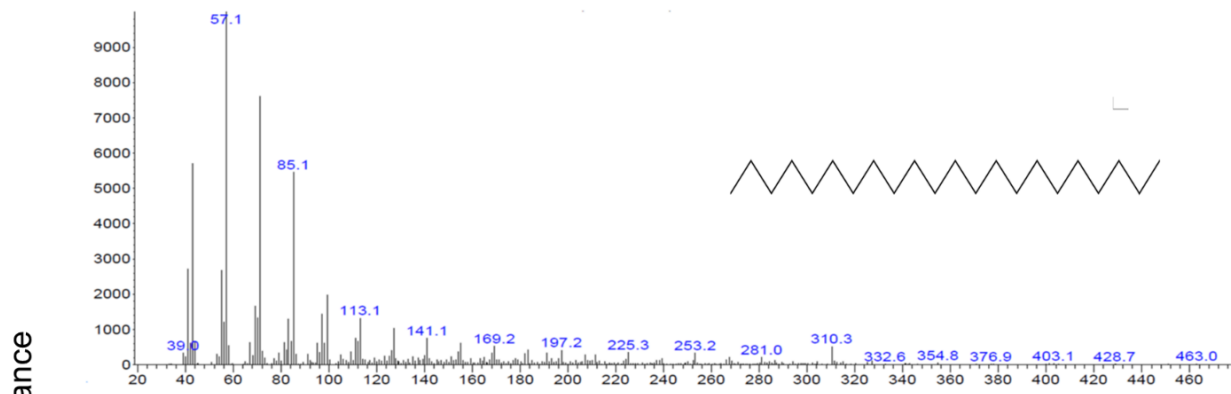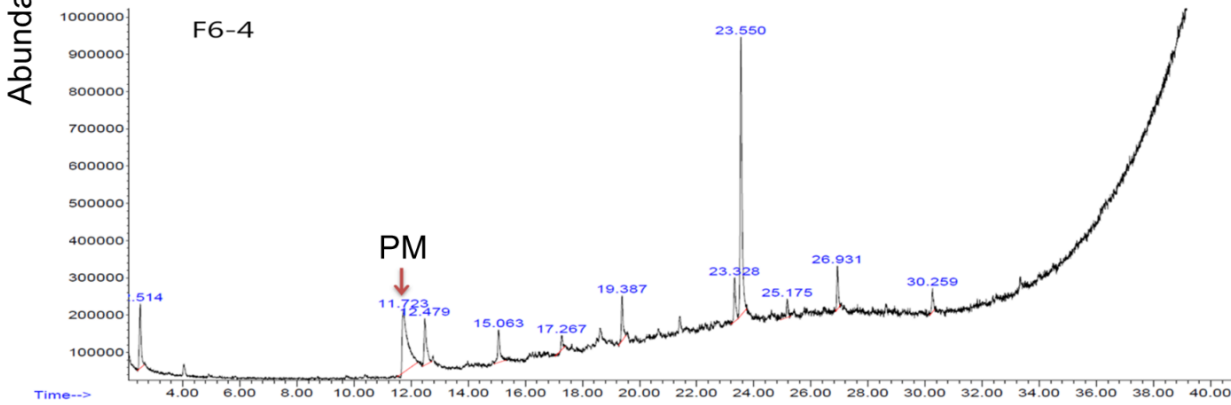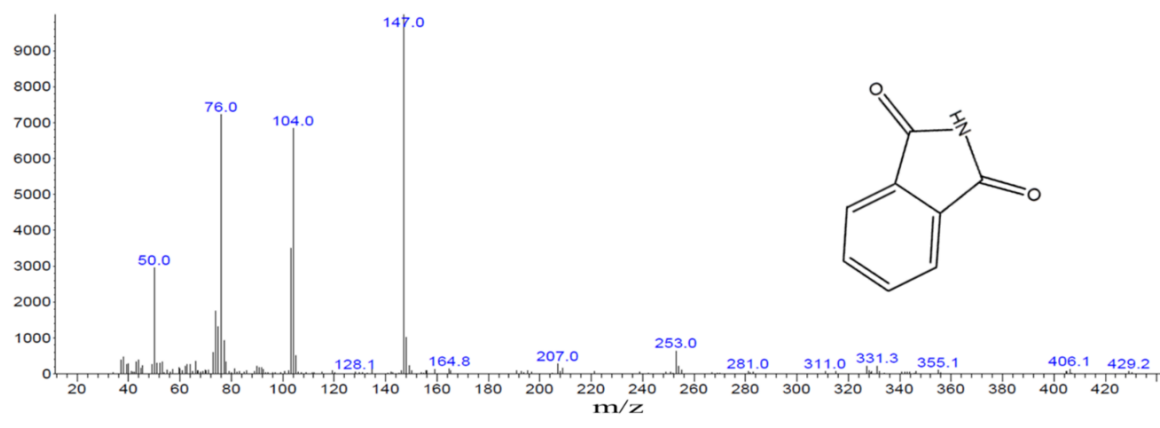

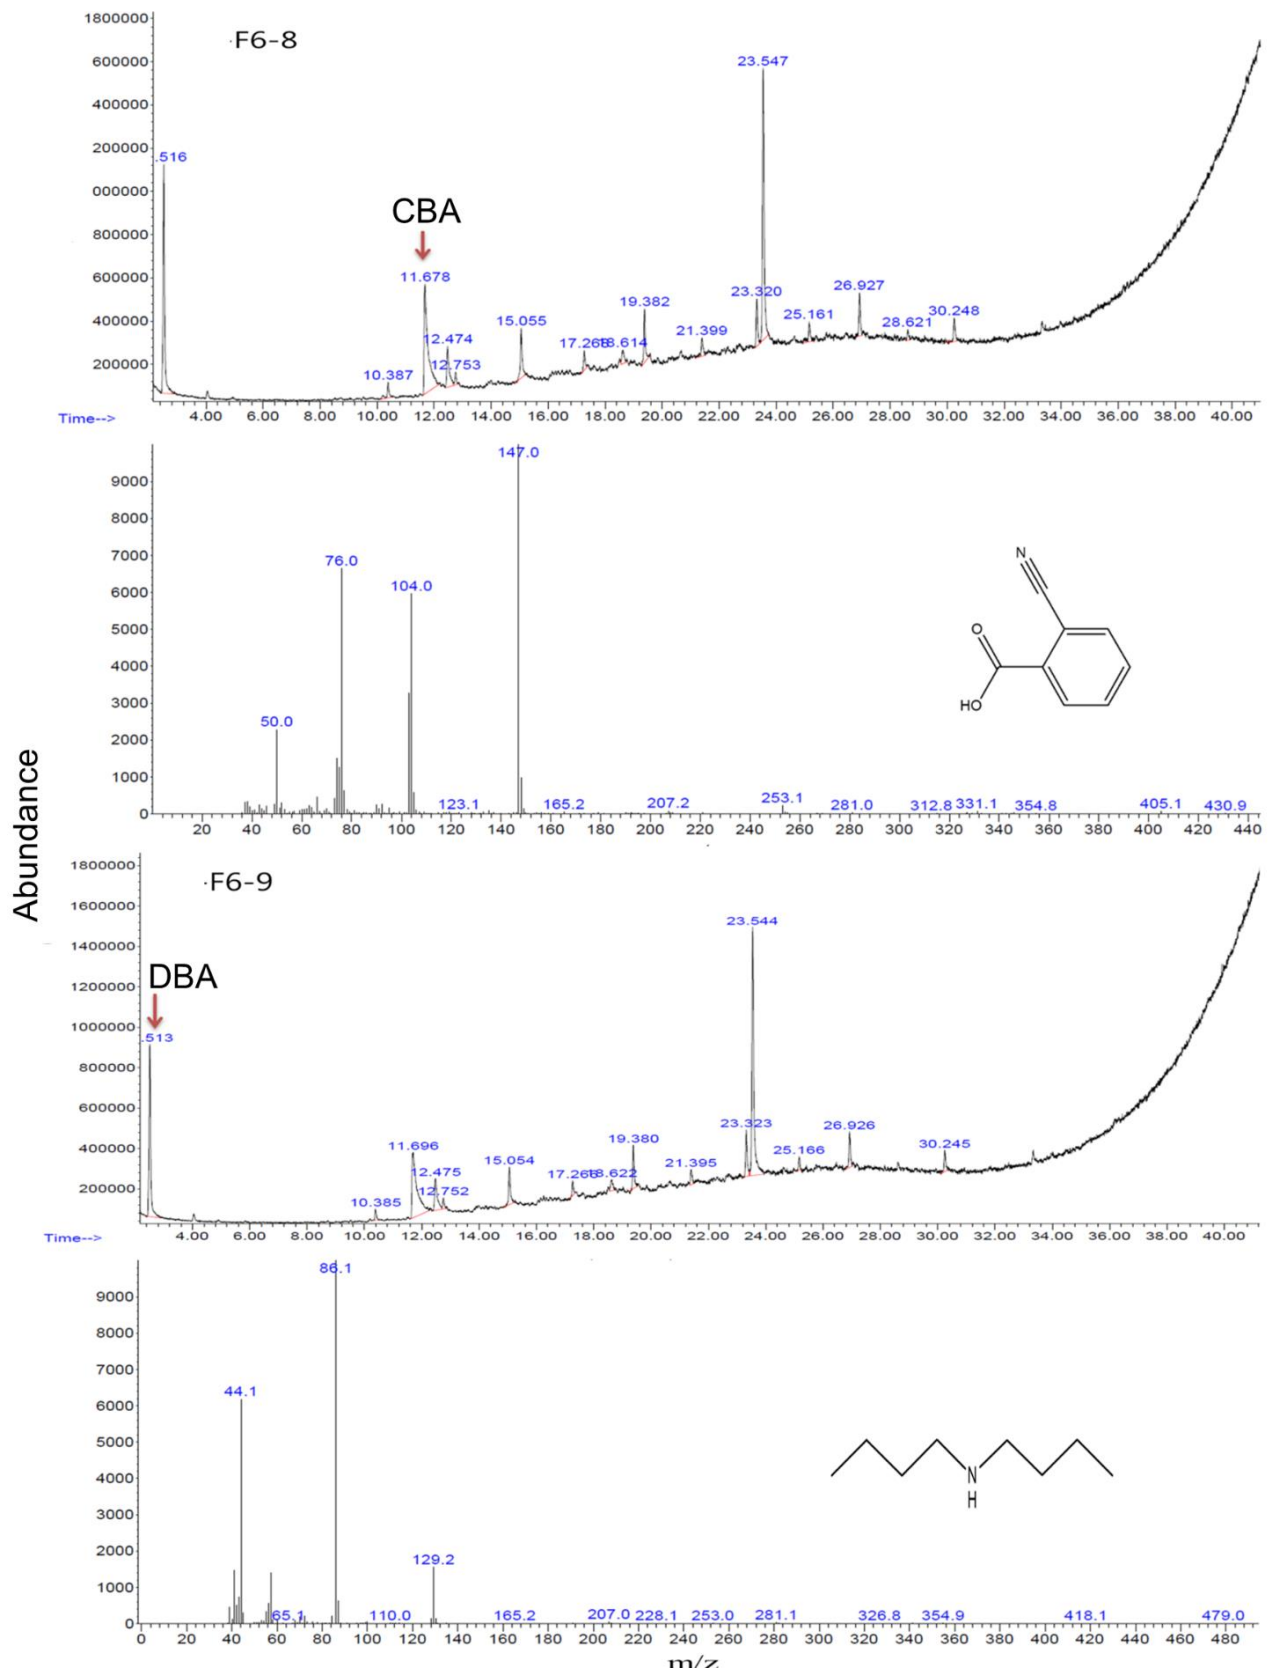

**Fig. S5**

**(A)**

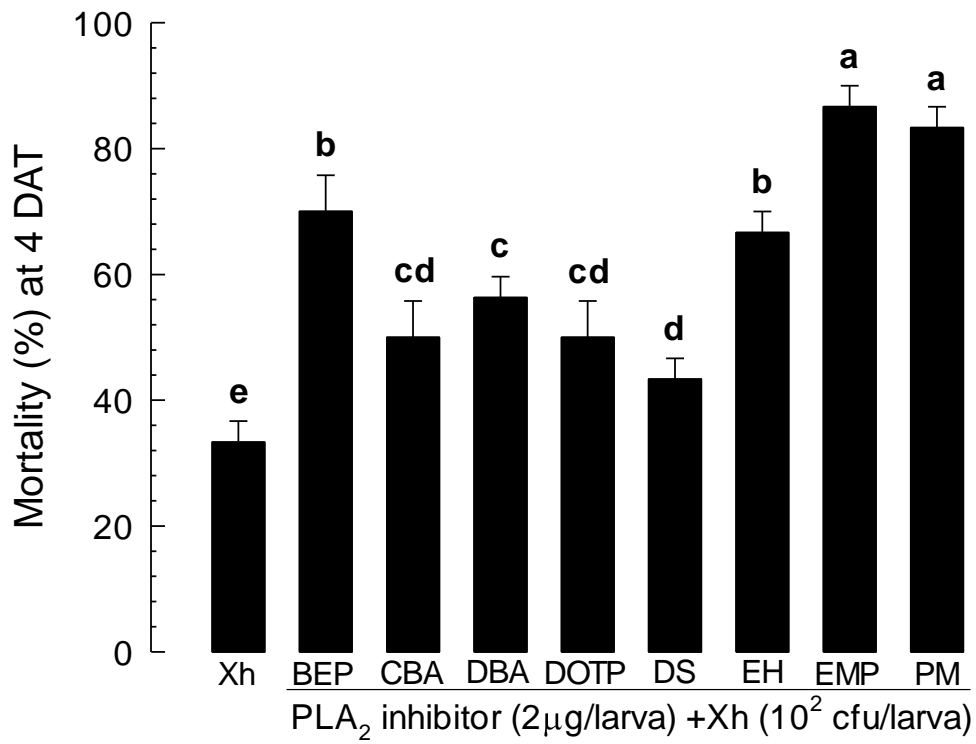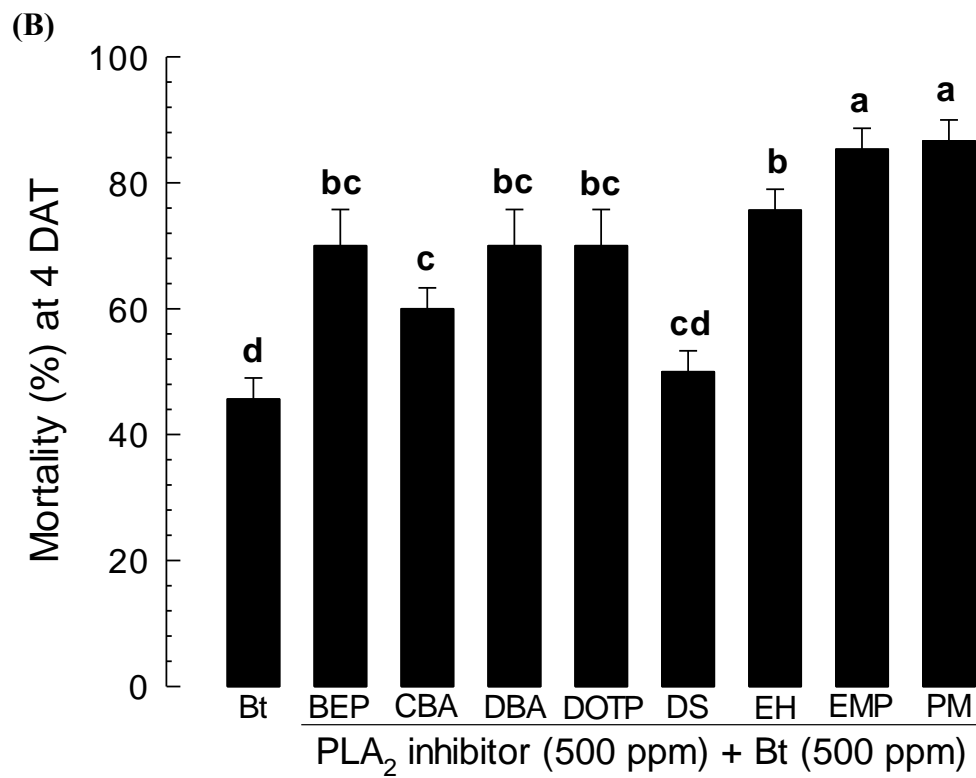

Fig. S6
